# Supplementary material
Source: publisher figshare collection journal article supplement (https://acs.figshare.com/ndownloader/files/21927294)
Supplement: Supplementary file 1 [file 21927294]

## SUPPORTING INFORMATION

### **Solvent-Free Synthesis of Mg-incorporated Nanocrystalline SAPO-34 Zeolites via Natural Clay for Chloromethane-to- Olefin Conversion**

*Ting Wang,<sup>a,b,‡</sup> Chengguang Yang,<sup>a,‡</sup> Shenggang Li,<sup>a,c,d</sup> Gan Yu,<sup>a,c</sup> Ziyu Liu,<sup>a</sup> Hui  
Wang,<sup>a</sup> Peng Gao<sup>a,b,d,\*</sup> and Yuhan Sun<sup>a,b,c,d,\*</sup>*

<sup>a</sup> CAS Key Laboratory of Low-carbon Conversion Science and Engineering,  
Shanghai Advanced Research Institute, Chinese Academy of Sciences, No.99 Haik  
Road, Zhangjiang Hi-Tech Park, Shanghai 201210, P.R. China.

<sup>b</sup> University of Chinese Academy of Science, Beijing, 100049, P.R. China

<sup>c</sup> School of Physical Science and Technology, ShanghaiTech University, Shanghai  
201210, P.R. China

<sup>d</sup> Dalian National Laboratory for Clean Energy, Dalian 116023, PR China

<sup>‡</sup> These authors contributed equally: Ting Wang and Chengguang Yang

\* Corresponding author. Tel: +86–021–20608002, Fax: +86–021–20608066.

*E-mail: gaopeng@sari.ac.cn (P. Gao); sunyh@sari.ac.cn (Y. Sun)*

Number of pages: 9

Number of figures: 4

Number of tables: 3

## Contents

### Experimental Section

|                                                                     |                  |
|---------------------------------------------------------------------|------------------|
| TEM images .....                                                    | <b>Figure S1</b> |
| FT-IR spectra .....                                                 | <b>Figure S2</b> |
| $^{31}\text{P}$ MAS NMR spectra .....                               | <b>Figure S3</b> |
| XRD patterns .....                                                  | <b>Figure S4</b> |
| Deconvolution results of the $^{31}\text{P}$ MAS NMR spectra .....  | <b>Table S1</b>  |
| Deconvolution results of the $^{29}\text{Si}$ MAS NMR spectra ..... | <b>Table S2</b>  |
| CMTO results .....                                                  | <b>Table S3</b>  |

## Experimental Section

**Chemicals and materials:** Tetraethylammonium hydroxide (TEAOH, 25 wt%) was used as structure-directing agents (SDAs). After being pretreated at 900 °C for 2 h, commercial Mg-rich clay (Figure S4, Shanghai Richjoint Chemical Reagents) was selected as combinational metal, silicon, and aluminum precursors. Phosphoric acid (85 wt%) provides the phosphorous source. Other Al and Si sources were supported by pseudo-boehmite (69 wt%  $\text{Al}_2\text{O}_3$ , Shandong Aluminum Co. Ltd., China) and Ludox AS-30 (30 wt%, Merck), respectively. Nano-sized magnesium oxide powder ( $\text{MgO}$ , 98.0 wt%) was purchased from Sigma-Aldrich.

**Synthesis of zeolite MgAPSO-34:** All the SAPO-34 and MgAPSO-34 zeolites were synthesized with significantly reduced SDAs consumption by a solvent-free method. The dry gel has a molar ratio of  $1.0 \text{ Al}_2\text{O}_3 : 0.3 \text{ SiO}_2 : 1.0 \text{ P}_2\text{O}_5 : 1.0 \text{ TEAOH} : x \text{ MgO} : 50.0 \text{ H}_2\text{O}$ , where  $x$  is 0, 0.18, and 0.35, and the resulting zeolite products were marked as SAPO-34, MgAPSO-34-C1, and MgAPSO-34-C2, respectively. When the clay is used as half or all of the silicon source, the corresponding  $x$  in the formula is 0.18 and 0.35, respectively. In a typical synthesis of MgAPSO-34-C2, quantitative clay was firstly mixed with TEAOH solution under stirring for 2 h to develop a homogeneous solution A. Then, solution A was added dropwise into the mixture of weighted phosphoric acid and pseudo-boehmite. Finally, SAPO-34 crystals were added into the reaction mixture as seeds with a mass ratio of SAPO-34 to  $\text{Al}_2\text{O}_3$  of 1/100. After drying at 80 °C for 12 h, the acidic dry gel was

transferred into a sealed autoclave, followed by being reacted at 220 °C for 24 h before cooling down. The solid-state products were dried at 100 °C for 12 h and then calcined in air at 600 °C for 5 h to remove SDAs.

For comparison, conventional MgAPSO-34 zeolite denoted as MgAPSO-34-M1 was prepared with the same procedure but using MgO powder as individual Mg sources.

**Characterization:** Powder XRD patterns were collected by a Rigaku Ultima IV X-ray diffractometer with Cu K $\alpha$  X-radiation (tube voltage: 40 kV and tube current: 40 mA). Scanning electron micrographs (SEM) were taken on a ZEISS SUPRA55 SAPPHIRE field emission scanning electron microscope at 2 kV. Samples for SEM analysis were coated using a Shanghai Fudi sputter coater with a gold-palladium target. Transmission electron microscopy (TEM) images were collected on a Tecnai F20 electron microscope.  $^{29}\text{Si}$  MAS NMR measurements were performed on a Bruker Advance-400 spectrometer operating at 99 MHz. The NMR spectra with high-power proton decoupling were recorded using a sample-rotation rate of 5 kHz and a 4 mm MAS probe head. Infrared spectra were collected on a Thermo Scientific Nicolet 6700 Fourier-transform infrared spectrometer (FT-IR). Nitrogen ( $\text{N}_2$ ) sorption measurements were carried out on a Micromeritics physisorption analyzer, ASAP 2020 instrument. The analyses of the calcined samples were acquired after outgassing at 300 °C. Thermogravimetric (TG) analysis was performed on a TGA NETZSCH, STA449F3 unit in air at a heating rate of 10 °C min $^{-1}$  from room temperature to 900 °C in air. Chemical compositions were determined with an X-ray fluorescence

(XRF) spectrometer (ZSX Primus). The temperature-programmed desorption of ammonia ( $\text{NH}_3$ -TPD) experiments was performed using a Tianjin Xianquan TP-5080 automated chemisorption analysis unit with a thermal conductivity detector (TCD) under helium flow. The UV-visible diffuse reflectance spectrum of the samples was determined by Shimadzu UV-2700.

**Testing of Catalytic Performance:** CMTO reaction was performed in a fixed bed reactor at atmospheric pressure. 1.0 g of catalyst (20-40 mesh) was loaded into the middle of stainless steel with an inner diameter of 1 cm. The sample was pretreated in a flow of dry nitrogen at 500 °C for 1 h and then the temperature of the reactor was adjusted to 400 °C and the atmosphere was replaced by  $\text{N}_2$  and  $\text{CH}_3\text{Cl}$  where the molar ratio of  $\text{N}_2$  to  $\text{CH}_3\text{Cl}$  was 20. The weight hourly space velocity (WHSV) was  $0.15 \text{ h}^{-1}$  for  $\text{CH}_3\text{Cl}$ . The reaction products were analyzed every 30 min by a gas chromatograph (Shimadzu GC-2014C), equipped with a flame ionization detector (FID) and Plot-Q column. The conversion was defined as the percentage of  $\text{CH}_3\text{Cl}$  consumed during the reaction, and the selectivity of each product was calculated as the percentage amount (in moles) of  $\text{CH}_3\text{Cl}$  converted to hydrocarbons. The carbon and chlorine balances were higher than 95%.

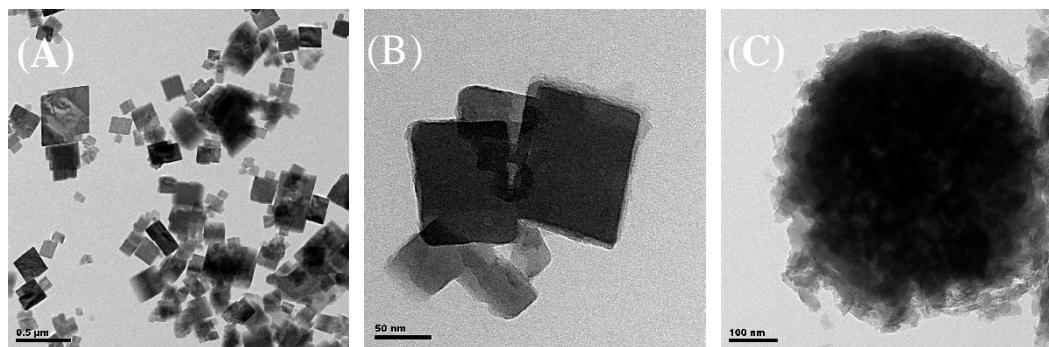

**Figure S1.** TEM of (A) SAPO-34, (B) MgAPSO-34-C1, and (C) MgAPSO-34-M1.

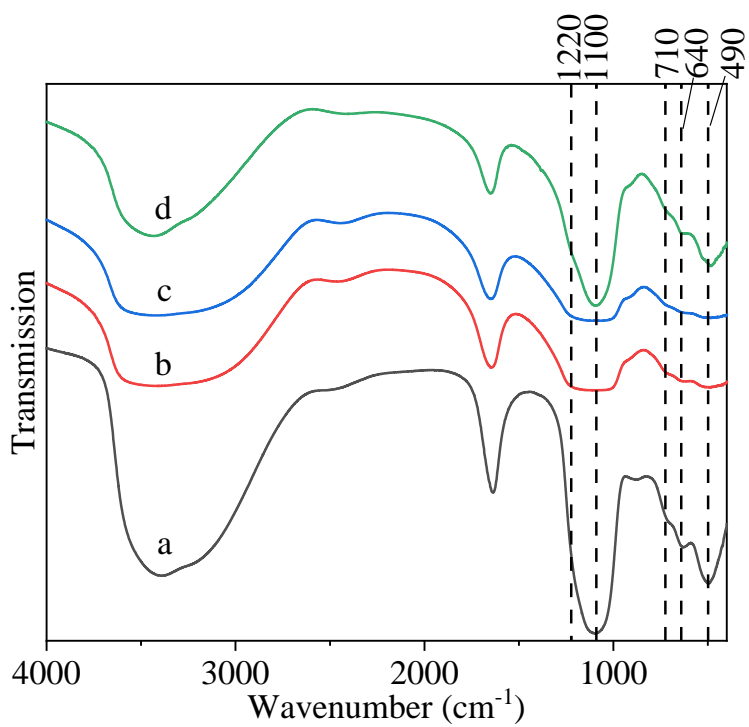

**Figure S2.** FT-IR spectra of (a) SAPO-34, (b) MgAPSO-34-C1, (c) MgAPSO-34-C2, (d) MgAPSO-34-M1.

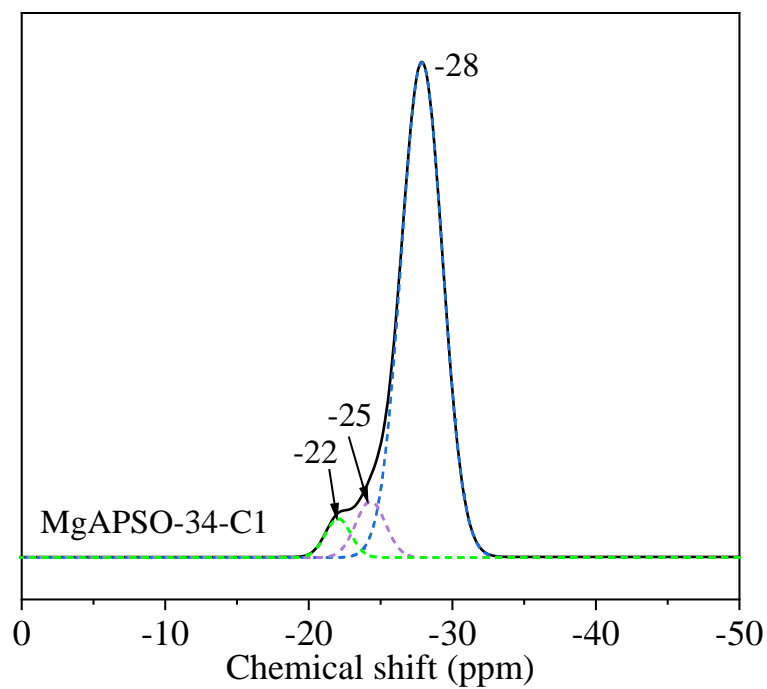

**Figure S3.**  $^{31}\text{P}$  MAS NMR spectra of the calcined MgAPSO-34-C1.

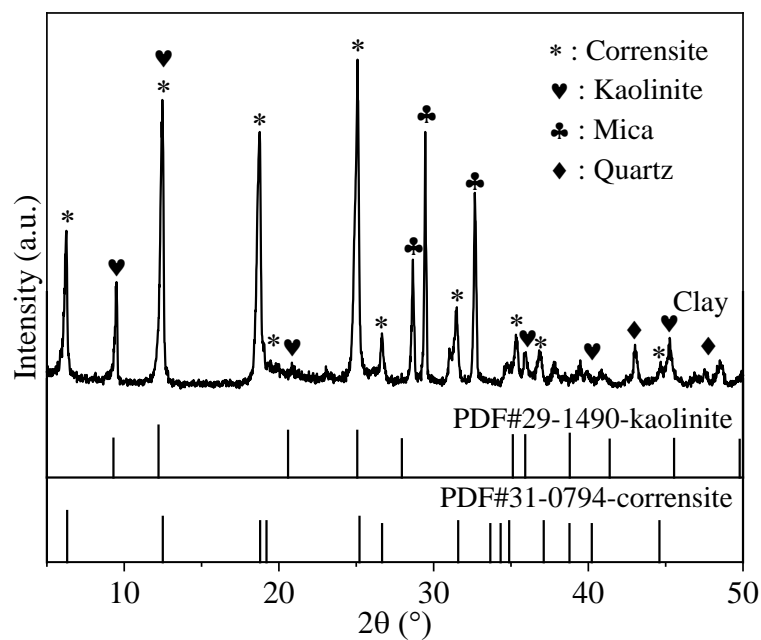

**Figure S4.** Powder XRD patterns of natural magnesium-rich clay mineral with atomic percentage of Mg, Al, and Si of 41.8, 22.6, and 35.6, respectively.



**Table S1.** Deconvolution results of the  $^{31}\text{P}$  MAS NMR spectra of MgAPSO-34-C1, C2, and M1 via the normalized peak areas of the different P species

| Sample       | P(4Al, 0Mg) | P(3Al, 1Mg)  | P(2Al, 2Mg) |
|--------------|-------------|--------------|-------------|
|              | –28 ppm     | –25, –22 ppm | –18 ppm     |
| MgAPSO-34-C1 | 91.10%      | 8.90%        | 0           |
| MgAPSO-34-C2 | 80.43%      | 17.01%       | 2.56%       |
| MgAPSO-34-M1 | 90.61%      | 9.39%        | 0           |

**Table S2.** Deconvolution results of the  $^{29}\text{Si}$  MAS NMR spectra of MgAPSO-34-C2 and SAPO-34-M1 via the normalized peak areas of the different Si species

| Sample       | Si(OH) or<br>Si(OH) $_2^a$ | Si(4Al) | Si(3Al) | Si(2Al)  | Si(1Al)  | Si(0Al)  |
|--------------|----------------------------|---------|---------|----------|----------|----------|
|              | –85 ppm                    | –91 ppm | –97 ppm | –102 ppm | –108 ppm | –112 ppm |
| MgAPSO-34-C2 | 11.58%                     | 16.77%  | 50.55%  | 11.06%   | 10.04%   | 0        |
| MgAPSO-34-M1 | 4.50%                      | 27.28%  | 39.88%  | 26.41%   | 0.55%    | 1.39%    |

$^a(\text{AlO})_3\text{Si}(\text{OH})$  or  $(\text{SiO})(\text{AlO})\text{Si}(\text{OH})_2$

**Table S3.** Detailed CMT0 results of the four catalysts (400°C, 0.15 h<sup>-1</sup>, 0.1 MPa)

| Sample       | Conv./% | CH <sub>4</sub> | C <sub>2</sub> H <sub>4</sub> | C <sub>2</sub> H <sub>6</sub> | C <sub>3</sub> H <sub>6</sub> | C <sub>3</sub> H <sub>8</sub> | C <sub>4</sub> H <sub>8</sub> | C <sub>4</sub> H <sub>10</sub> | C <sub>5</sub> <sup>+</sup> | C <sub>2</sub> <sup>=</sup> + C <sub>3</sub> <sup>=</sup> |
|--------------|---------|-----------------|-------------------------------|-------------------------------|-------------------------------|-------------------------------|-------------------------------|--------------------------------|-----------------------------|-----------------------------------------------------------|
| SAPO-34      | 77.79   | 1.64            | 48.27                         | 0.36                          | 30.27                         | 1.19                          | 9.07                          | 2.14                           | 6.22                        | 78.54                                                     |
| MgAPSO-34-C1 | 99.68   | 1.39            | 44.67                         | 0.22                          | 37.03                         | 0.88                          | 6.39                          | 2.20                           | 5.82                        | 81.70                                                     |
| MgAPSO-34-C2 | 61.76   | 1.16            | 40.62                         | 0.14                          | 40.18                         | 0.93                          | 6.37                          | 2.62                           | 6.44                        | 80.81                                                     |
| MgAPSO-34-M1 | 51.90   | 1.89            | 43.68                         | 0.22                          | 36.75                         | 0.62                          | 7.27                          | 3.71                           | 4.47                        | 80.43                                                     |
